# Supplementary material for: Integration of Liver Glycogen and Triglyceride NMR Isotopomer Analyses Provides a Comprehensive Coverage of Hepatic Glucose and Fructose Metabolism
Source: MDPI journal article supplement (doi:10.3390/metabo12111142), 2022-11-19
Supplement: s1 [file s1]

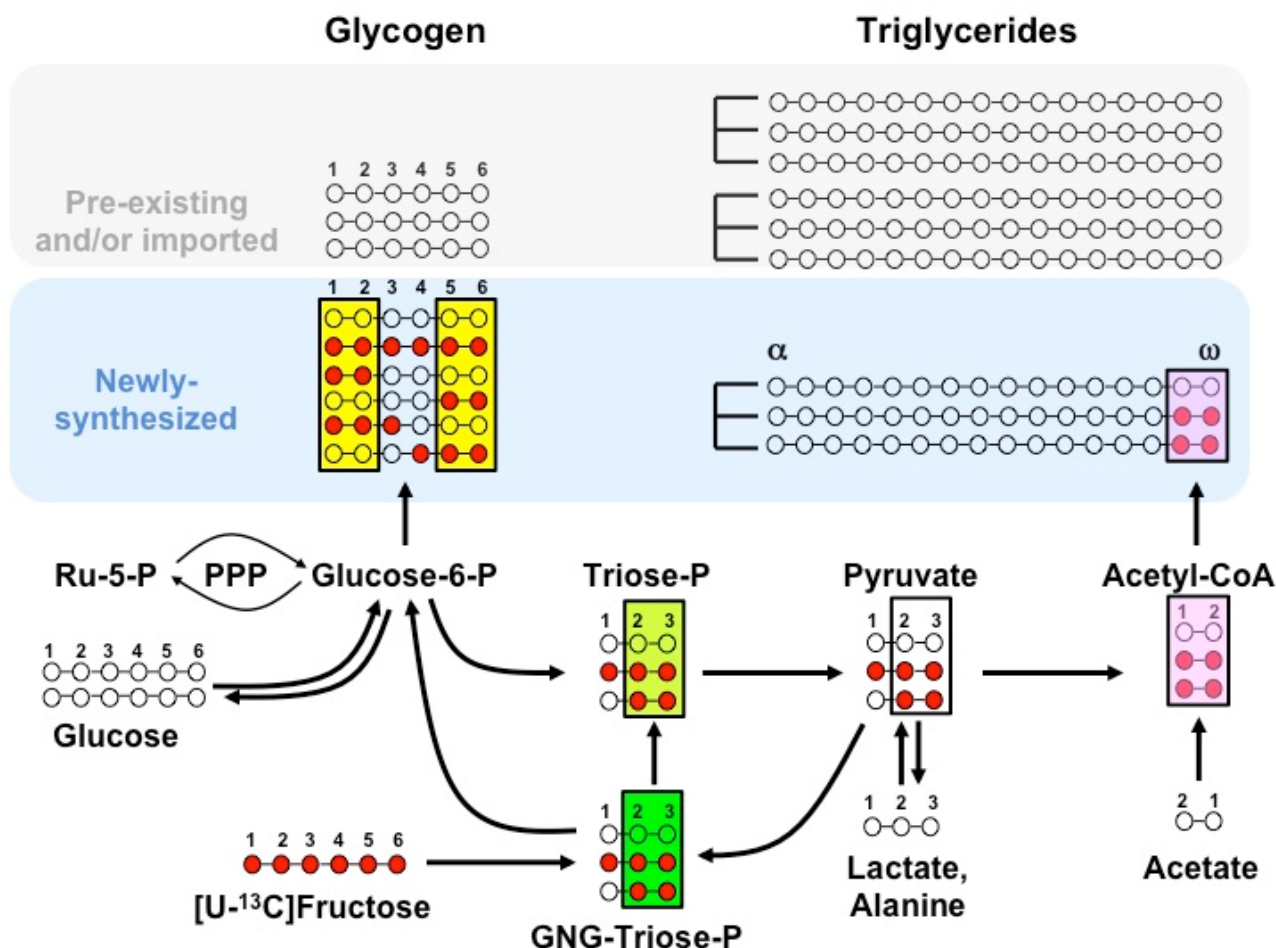

**Supplementary Figure S1:**  $^{13}C$ -Isotopomers of selected metabolic intermediates generated from  $[U-^{13}C]$ fructose metabolism into lipogenic and glycogenic pathways. These include hepatic glucose-6-P - inferred from the analysis of newly-synthesized glycogen; triose-P recruited for gluconeogenesis (GNG-triose-P) – inferred from the analysis of indirect pathway glycogen  $^{13}C$ -isotopomers; triose-P supplying glycerol-3-P for fatty acid esterification and acetyl-CoA units for de novo lipogenesis – inferred from the  $^{13}C$ -isotopomer analysis of newly-synthesized triglyceride glycerol, and the acetyl-CoA pool supplying lipogenesis – inferred from the  $^{13}C$ -isotopomer analysis of newly-synthesized fatty acids. For the metabolite carbon skeletons, the red filled and unfilled circles represent  $^{13}C$  and  $^{12}C$ , respectively. The shading highlights those isotopomers that form  $[U-^{13}C]$ acetyl CoA and the colors indicate isotopic equivalence (same color) or non-equivalence (different colors). For simplicity, in depicting the fatty acid labeling, only the  $^{13}C$ -isotopomers of the last two fatty acid carbons (representing the first acetyl-CoA moiety to be incorporated into DNL) are shown.

**Supplementary Table S1:** Liver glycogen  $^{13}\text{C}$ -isotopomer enrichments from mice provided with  $[\text{U-}^{13}\text{C}]\text{glucose}$  ( $n=4$ ) and  $[\text{U-}^{13}\text{C}]\text{fructose}$  ( $n=5$ ). The glycogen  $^{13}\text{C}$ -isotopomers shown in bold text are metabolized to  $[\text{U-}^{13}\text{C}]\text{acetyl-CoA}$ . Values are reported as means  $\pm$  S.D.

| <b>Glycogen <math>^{13}\text{C}</math>-isotopomer</b>             | <b><math>[\text{U-}^{13}\text{C}]\text{Glucose}</math></b> | <b><math>[\text{U-}^{13}\text{C}]\text{Fructose}</math></b> |
|-------------------------------------------------------------------|------------------------------------------------------------|-------------------------------------------------------------|
| <b><math>[\text{U-}^{13}\text{C}]\text{glycogen}</math></b>       | <b><math>2.45 \pm 0.84</math></b>                          | <b><math>0.56 \pm 0.13</math></b>                           |
| <b><math>[1,2,3\text{-}^{13}\text{C}_3]\text{glycogen}</math></b> | <b><math>0.84 \pm 0.54</math></b>                          | <b><math>1.84 \pm 0.49</math></b>                           |
| <b><math>[4,5,6\text{-}^{13}\text{C}_3]\text{glycogen}</math></b> | <b><math>1.03 \pm 0.43</math></b>                          | <b><math>2.03 \pm 0.21</math></b>                           |
| <b><math>[1,2\text{-}^{13}\text{C}_2]\text{glycogen}</math></b>   | <b><math>0.38 \pm 0.12</math></b>                          | <b><math>0.40 \pm 0.08</math></b>                           |
| <b><math>[5,6\text{-}^{13}\text{C}_2]\text{glycogen}</math></b>   | <b><math>0.03 \pm 0.04</math></b>                          | <b><math>0.11 \pm 0.03</math></b>                           |
| $[2,3\text{-}^{13}\text{C}_2]\text{glycogen}$                     | $0.02 \pm 0.02$                                            | $0.09 \pm 0.02$                                             |
| $[4,5\text{-}^{13}\text{C}_2]\text{glycogen}$                     | $0.02 \pm 0.03$                                            | $0.11 \pm 0.03$                                             |

**Supplementary Table S2:** Newly synthesized glycogen fraction ( $f_{\text{glycogen}}$ ) with direct and indirect pathway contributions to the newly synthesized glycogen ( $f_{\text{direct}}$  and  $f_{\text{indirect}}$ ), and newly synthesized triglyceride glyceryl and fatty acid fractions ( $f_{\text{glyceryl}}$  and  $f_{\text{fatty acid}}$ ) from  $^2\text{H}$ -enrichment data of liver glycogen and triglyceride, respectively. Values are reported as means  $\pm$  S.D.

| $^{13}\text{C}$ -tracer             | Glycogen              |                     |                       | Triglyceride          |                         |
|-------------------------------------|-----------------------|---------------------|-----------------------|-----------------------|-------------------------|
|                                     | $f_{\text{glycogen}}$ | $f_{\text{direct}}$ | $f_{\text{indirect}}$ | $f_{\text{glyceryl}}$ | $f_{\text{fatty acid}}$ |
| [U- $^{13}\text{C}$ ]glucose (n=4)  | $0.73 \pm 0.11$       | $0.62 \pm 0.04$     | $0.38 \pm 0.04$       | $0.31 \pm 0.10$       | $0.16 \pm 0.05$         |
| [U- $^{13}\text{C}$ ]fructose (n=5) | $0.74 \pm 0.08$       | $0.66 \pm 0.02$     | $0.34 \pm 0.04$       | $0.30 \pm 0.07$       | $0.16 \pm 0.05$         |
